# Supplementary material for: A feedback loop regulates splicing of the spinal muscular atrophy-modifying gene, SMN2
Source: PubMed Central journal article supplement — Hum Mol Genet. 2010 Sep 30;19(24):4906–17. doi: 10.1093/hmg/ddq425 (PMC2989896; doi:10.1093/hmg/ddq425), 2010-09-30
Supplement: supp_ddq425_ddq425supp.pdf [file supp_ddq425_ddq425supp.pdf]

**Supplemental Table 1**

| <b>Name</b>         | <b>Sequence</b>                                                       |
|---------------------|-----------------------------------------------------------------------|
| <b>primer</b>       |                                                                       |
| U1 For              | 5'-AGTGGGGGACTGCG-3'                                                  |
| U1 Rev              | 5'-CACAAATTATGCAGTCGAGTTTCC-3'                                        |
| U2 For              | 5'-TTTGGCTAAGATCAAGTGTAGTATCTGTTC-3'                                  |
| U2 Rev              | 5'-AATCCATTTAATATATTGTCCTCGGATAGA-3'                                  |
| U4 For              | 5'-GCGCGATTATTGCTAATTGAAA-3'                                          |
| U4 Rev              | 5'-AAAAATTGCCAATGCCGACTA-3'                                           |
| U5 For              | 5'-GGTTTCTCTTCAGATCGCATAAATC-3'                                       |
| U5 Rev              | 5'-CTCAAAAATTGGGTTAAGACTCAGA-3'                                       |
| RPL39 For           | 5'-GGATTCGGATGAAAACCTGGA-3'                                           |
| RPL39 Rev           | 5'-ACCCAGCTTGGTTCTTCTCC-3'                                            |
| Sno48 For           | 5'-AGTGATGATGACCCCAG-3'                                               |
| E4-33to55-F         | 5'-AAGTGAGAACTCCAGGTCTCCTG-3'                                         |
| E8-15to36-R         | 5'-GTGGTGTCAATTTAGTGCTGCTC-3'                                         |
| SMNex1XhoI          | 5'-CCGCTCGAGGCCACCATGGCGATGAGCAGCGG-3'                                |
| SMNsiMis For        | 5'-GCAAAAGAAGAATACCGCTGCAAGCTTACAACAGTGGAAG-3'                        |
| SMNsiMis Rev        | 5'-CTTTCCACTGTTGTAAGCTTGCAGCGGTATTCTTCTTTGC-3'                        |
| SMNexon6Xho         | 5'-CGATCTCGAGATAATTCCCCACCTCCC-3'                                     |
| SMNexon8NotI        | 5'-ATATGCGGCCGCCACATACGCCTCACATACA-3'                                 |
| T7SMNex6            | 5'-TAATACGACTCACTATAGGATAATTCCCCACCTCC-3'                             |
| SMNex8-75R+5'       | 5'-AAGTACTTACCTGTAACGTTTACATTCCAGATCTGTC-3'                           |
| pCI-FwdB            | 5'-GACTCACTATAGGCTAGCCTCG-3'                                          |
| pCI-Rev             | 5'-GTATCTTATCATGTCTGCTCG-3'                                           |
| Modban              | 5'-ATTGATGGTGCCTACAG-3'                                               |
| <b>siRNA duplex</b> |                                                                       |
| snrpD3              | 5' ACAGUCACAUACAGAGAUGGCCGAG-3'<br>3' -AGUGUCAGUGUAUGUCUCUACCGGCUC-3' |
| SnrpB2 (B'')        | 5' -GGACUUAAAUAUCCAGUGUUUCTT-3'<br>3' -UUCCUGAAUUAAAUAGGUCACAAAGAA-5' |
| U1-70K              | 5' -GCUCCGGAGAAUGGGUAUUUGAUGG-3'<br>3' -ACCGAGGCCUCUUACCCAUAACUACC-5' |
| SMN                 | 5' -UUGUAAGGAAGCUGCAGUAUUCUUCUU-3'<br>3' -AACAUCCUUCGACGUCAUAAGAAG-5' |
